# Supplementary material for: Baseline Characteristics and Outcomes of Cancer Patients Infected with SARS-CoV-2 in the Lombardy Region, Italy (AIOM-L CORONA): A Multicenter, Observational, Ambispective, Cohort Study
Source: MDPI journal article supplement (doi:10.3390/cancers13061324), 2021-03-16
Supplement: s1 [file s1]

# Baseline Characteristics and Outcomes of Cancer Patients Infected with SARS-CoV-2 in the Lombardy Region, Italy (AIOM-L CORONA): A Multicenter, Observational, Ambispective, Cohort Study

Serena Di Cosimo, Barbara Tagliaferri, Daniele Generali, Fabiola Giudici, Francesco Agustoni, Antonio Bernardo, Karen Borgonovo, Gabriella Farina, Giovanna Luchena, Andrea Luciani, Franco Nolè, Laura Palmeri, Filippo Pietrantonio, Guido Poggi, Paolo Andrea Zucali, Emanuela Balletti, Giovanna Catania, Ottavia Bernocchi, Federica D'Antonio, Monica Giordano, Francesco Grossi, Angioletta Lasagna, Nicla La Verde, Mariangela Manzoni, Benedetta Montagna, Angelo Olgiati, Alessandra Raimondi, Irene Rampinelli, Elena Verri, Alberto Zaniboni, Massimo Di Maio, Giordano Beretta and Marco Danova

**Table S1.** Characteristics of 29 non metastatic patients not receiving SACT.

| Characteristic                                  | Patients (N = 29) |
|-------------------------------------------------|-------------------|
| <b>Median age (Range), years</b>                | 68 (45–85)        |
| <b>Male sex (N,%)</b>                           | 19 (65.5%)        |
| <b>Comorbidity (N, %)</b>                       |                   |
| None                                            | 7 (24.1%)         |
| 1                                               | 10 (34.5%)        |
| ≥2                                              | 12 (41.4%)        |
| <b>ECOG Performance Status (N, %)</b>           |                   |
| 0                                               | 17 (81.0%)        |
| 1                                               | 3 (14.3%)         |
| 2–3                                             | 1 (4.7%)          |
| Subtotal                                        | 21                |
| Unknown (N,%)                                   | 8 (27.6%)         |
| <b>Tumour diagnosis (N, %)</b>                  |                   |
| Colorectal                                      | 8 (27.6%)         |
| GI-no colorectal                                | 7 (24.1%)         |
| Breast                                          | 6 (20.7%)         |
| Genitourinary tract cancer                      | 3 (10.3%)         |
| Lung                                            | 2 (6.9%)          |
| Head and Neck                                   | 2 (6.9%)          |
| Gynecological                                   | 1 (3.4%)          |
| <b>Stage (N, %)</b>                             |                   |
| I                                               | 12 (41.4%)        |
| II                                              | 6 (20.7%)         |
| III                                             | 11 (37.9%)        |
| <b>Symptoms (N, %)</b>                          |                   |
| Yes                                             | 29 (100.0%)       |
| <b>Type of Symptom (N, %)</b>                   |                   |
| Fever                                           | 22 (75.9%)        |
| Cough                                           | 16 (55.2%)        |
| Dyspnoea                                        | 18 (62.1%)        |
| Desaturation                                    | 18 (62.1%)        |
| <b>Interstitial pneumonia (N, %)</b>            |                   |
| Yes                                             | 23 (92.0%)        |
| Subtotal                                        | 25                |
| Unknown (N, %)                                  | 4 (13.8%)         |
| <b>Covid 19 Therapy</b>                         |                   |
| Yes                                             | 23 (79.3%)        |
| <b>Progression Disease at COVID19 diagnosis</b> |                   |
| Yes                                             | 0 (0.0%)          |
| Subtotal                                        | 19                |
| Unknown                                         | 10 (34.5%)        |

|                                                                        |                |            |
|------------------------------------------------------------------------|----------------|------------|
| <b>Oncological Progression Disease after COVID19 infection (N, %)</b>  |                |            |
|                                                                        | Yes            | 1 (4.5%)   |
|                                                                        | Subtotal       | 22         |
|                                                                        | Unknown (N, %) | 7 (24.1%)  |
| <b>Ordinary Hospitalization</b>                                        |                |            |
|                                                                        | Yes            | 24 (82.8%) |
| <b>Admission to Intensive Care Unit after Ordinary Hospitalization</b> |                |            |
|                                                                        | Yes            | 3 (11.5%)  |
|                                                                        | Subtotal       | 26         |
|                                                                        | Unknown        | 3 (10.3%)  |
| <b>Mortality within 30 days of COVID-19 diagnosis</b>                  |                |            |
|                                                                        | Yes            | 9 (31.0%)  |

**Table S2.** Characteristics of 43 metastatic cancer patients not receiving SACT.

| Characteristic                                                         | Patients (N = 43) |
|------------------------------------------------------------------------|-------------------|
| <b>Median age (Range), years</b>                                       | 71 (40–89)        |
| <b>Male sex (N,%)</b>                                                  | 24 (55.8%)        |
| <b>Comorbidity (N, %)</b>                                              |                   |
| None                                                                   | 11 (25.6%)        |
| 1                                                                      | 15 (34.5%)        |
| ≥2                                                                     | 17 (39.5%)        |
| <b>ECOG Performance Status (N, %)</b>                                  |                   |
| 0                                                                      | 12 (36.4%)        |
| 1                                                                      | 16 (48.5%)        |
| 2–3                                                                    | 5 (15.1%)^        |
| Subtotal                                                               | 33                |
| Unknown (N,%)                                                          | 10 (23.3%)        |
| <b>Tumour diagnosis (N, %)</b>                                         |                   |
| <b>Lung</b>                                                            | 14 (32.6%)^       |
| GI-no colorectal                                                       | 12 (27.9%)        |
| <b>Hematological</b>                                                   | 6 (14.0%)^        |
| Breast                                                                 | 4 (9.3%)          |
| Colorectal                                                             | 3 (7.0%)          |
| Genitourinary tract cancer                                             | 2 (4.7%)          |
| Melanoma                                                               | 1 (2.3%)          |
| Brain                                                                  | 1 (2.3%)          |
| <b>Symptoms (N, %)</b>                                                 |                   |
| <b>Yes</b>                                                             | 38 (88.4%)        |
| <b>Type of Symptom (N, %)</b>                                          |                   |
| Fever                                                                  | 30 (71.4%)        |
| Cough                                                                  | 11 (25.6%)        |
| Dyspnoea                                                               | 28 (66.7%)        |
| Desaturation                                                           | 30 (69.8%)        |
| <b>Interstitial pneumonia (N, %)</b>                                   |                   |
| Yes                                                                    | 23 (88.9%)        |
| Subtotal                                                               | 36                |
| Unknown (N, %)                                                         | 7 (16.3%)         |
| <b>Covid 19 Therapy</b>                                                |                   |
| Yes                                                                    | 37 (88.1%)        |
| Subtotal                                                               | 42                |
| Unknown                                                                | 1 (2.3%)          |
| <b>Progression Disease at COVID19 diagnosis</b>                        |                   |
| Yes                                                                    | 6 (25.0 %)        |
| Subtotal                                                               | 24                |
| Unknown                                                                | 19 (44.2%)        |
| <b>Oncological Progression Disease after COVID19 infection (N, %)</b>  |                   |
| Yes                                                                    | 1 (3.7%)          |
| Subtotal                                                               | 27                |
| Unknown (N, %)                                                         | 16 (37.2%)        |
| <b>Ordinary Hospitalization</b>                                        |                   |
| Yes                                                                    | 40 (93.0%)        |
| <b>Admission to Intensive Care Unit after Ordinary Hospitalization</b> |                   |
| Yes                                                                    | 1 (2.4%)          |
| Subtotal                                                               | 41                |
| Unknown                                                                | 2 (4.7%)          |
| <b>Mortality within 30 days of COVID-19 diagnosis</b>                  |                   |
| Yes                                                                    | 28 (66.7%)        |
| Subtotal                                                               | 42                |
| Unknown                                                                | 1 (2.3%)          |

^As compared to patients on active therapy, untreated cases were more likely to present with ECOG 2–3, i.e., 5/33 (15%) versus 6/75 (8%),  $p = 0.26$ , lung cancer, i.e., 14/43 (32.5%) versus 21/108 (19.4%),  $p = 0.08$ , and haematological disease, i.e., 6/43 versus 5/108,  $p = 0.04$ .

**Table S3.** Characteristics of 61 patients not receiving anti-COVID-19 therapy.

| Characteristic                                                         | Patients (N = 61) |
|------------------------------------------------------------------------|-------------------|
| <b>Median age (Range), years</b>                                       | 61 (31–88)        |
| <b>Male sex (N,%)</b>                                                  | 20 (32.8%)        |
| <b>Comorbidity (N, %)</b>                                              |                   |
| None                                                                   | 24 (39.3%)        |
| 1                                                                      | 28 (45.9%)        |
| ≥2                                                                     | 9 (14.8%)         |
| <b>ECOG Performance Status (N, %)</b>                                  |                   |
| 0                                                                      | 36(76.6%)         |
| 1                                                                      | 7 (14.9%)         |
| 2–3                                                                    | 4 (8.5%)          |
| Subtotal                                                               | 47                |
| Unknown (N,%)                                                          | 14 (23.0%)        |
| <b>Stage</b>                                                           |                   |
| I                                                                      | 8 (13.1%)         |
| II                                                                     | 9 (14.8%)         |
| III                                                                    | 6 (9.8%)          |
| IV                                                                     | 38 (62.3%)        |
| <b>Tumour diagnosis (N, %)</b>                                         |                   |
| Breast                                                                 | 28 (45.9%)        |
| GI-no colorectal                                                       | 9 (14.8%)         |
| Colorectal                                                             | 7 (11.5%)         |
| Lung                                                                   | 6 (9.8%)          |
| Genitourinary tract cancer                                             | 3 (4.9%)          |
| Head and Neck                                                          | 2 (3.3%)          |
| Melanoma                                                               | 2 (3.3%)          |
| Hematologic                                                            | 2 (3.3%)          |
| Brain                                                                  | 1 (1.6%)          |
| Gynecological                                                          | 1 (1.6%)          |
| <b>Active Anticancer Treatment (N,%)</b>                               |                   |
| Yes                                                                    | 49 (81.7%)        |
| Subtotal                                                               | 60                |
| Unknown                                                                | 1 (1.6%)          |
| <b>Symptoms (N, %)</b>                                                 |                   |
| Yes                                                                    | 34 (55.7%)        |
| <b>Type of Symptom (N, %)</b>                                          |                   |
| Fever                                                                  | 33 (55.9%)        |
| Subtotal                                                               | 59                |
| Unknown                                                                | 2 (3.3%)          |
| Cough                                                                  | 24 (42.1%)        |
| Subtotal                                                               | 57                |
| Unknown                                                                | 4 (6.6%)          |
| Dyspnoea                                                               | 12 (21.0%)        |
| Subtotal                                                               | 57                |
| Unknown                                                                | 4(6.6%)           |
| Desaturation                                                           | 3 (5.3%)          |
| Subtotal                                                               | 57                |
| Unknown                                                                | 4 (6.6%)          |
| <b>Interstitial pneumonia (N, %)</b>                                   |                   |
| Yes                                                                    | 21 (48.8%)        |
| Subtotal                                                               | 43                |
| Unknown (N, %)                                                         | 18 (29.5%)        |
| <b>Progression Disease at COVID19 diagnosis</b>                        |                   |
| Yes                                                                    | 6 (25.0 %)        |
| Subtotal                                                               | 24                |
| Unknown                                                                | 19 (44.2%)        |
| <b>Oncological Progression Disease after COVID19 infection (N, %)</b>  |                   |
| Yes                                                                    | 1 (3.7%)          |
| Subtotal                                                               | 27                |
| Unknown (N, %)                                                         | 16 (37.2%)        |
| <b>Ordinary Hospitalization</b>                                        |                   |
| Yes                                                                    | 12 (20.3%)        |
| Subtotal                                                               | 59                |
| Unknown                                                                | 2 (3.3%)          |
| <b>Admission to Intensive Care Unit after Ordinary Hospitalization</b> |                   |
| Yes                                                                    | 0 (0.0%)          |
| Subtotal                                                               | 59                |

|                                                       |            |
|-------------------------------------------------------|------------|
| Unknown                                               | 2 (3.3%)   |
| <b>Mortality within 30 days of COVID-19 diagnosis</b> |            |
| Yes                                                   | 12 (21.4%) |
| Subtotal                                              | 56         |
| Unknown                                               | 5 (8.2%)   |

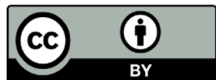

© 2021 by the authors. Licensee MDPI, Basel, Switzerland. This article is an open access article distributed under the terms and conditions of the Creative Commons Attribution (CC BY) license (<http://creativecommons.org/licenses/by/4.0/>).
